# Supplementary material for: Targeted proteomics identify metabolism-dependent interactors of yeast cytochrome c peroxidase: implications in stress response and heme trafficking
Source: Royal Society of Chemistry journal article supplement (doi:10.1039/c5mt00330j), 2016-03-10
Supplement: c5mt00330j1.pdf [file c5mt00330j1.pdf]

## SUPPLEMENTAL INFORMATION

### Targeted proteomics identify metabolism-dependent interactors of yeast cytochrome c peroxidase: Implications in stress response and heme trafficking

M. Kathiresan and A. M. English\*

## Contents

|                                                                                                                     |   |
|---------------------------------------------------------------------------------------------------------------------|---|
| Table S1: CCP activity of GST-holoCcp1 <sup>a</sup> .....                                                           | 2 |
| Table S2: Interactors in the GST pulldowns from 1 and 7 d yeast extracts ( <i>n</i> =6) <sup>a</sup> .....          | 3 |
| Table S3: Reported Ccp1 interactors collated from the <i>Saccharomyces</i> Genome Database (SGD) <sup>a</sup> ..... | 4 |
| Figure S1: SD-PAGE analysis of recombinant GST-Ccp1 purification.....                                               | 5 |
| Screening for Ccp1 as an interactor of Sod2 in 1 d yeast cells expressing the GST-Sod2 fusion .....                 | 5 |
| Figure S2: Identification of Ccp1 in a GST-Sod2 pulldown from a soluble protein extract of 1 d yeast. ....          | 7 |
| Figure S3: Sequence alignment of the TDH3/2/1 isoforms of yeast GAPDH. ....                                         | 8 |
| References .....                                                                                                    | 8 |

**Table S1: CCP activity of GST-holoCcp1<sup>a</sup>**

| <b>Protein<sup>b</sup></b> | <b>CCP activity<sup>a</sup></b> | <b>Percent activity<sup>c</sup></b> |
|----------------------------|---------------------------------|-------------------------------------|
| Wild-type Ccp1             | 1.70 ± 0.010                    | 100 ± 0.00                          |
| GST-holoCcp1               | 0.96 ± 0.020                    | 56.4 ± 4.86                         |
| GST-apoCcp1                | 0.06 ± 0.008                    | 3.50 ± 0.30                         |

<sup>a</sup> One unit of CCP activity catalyzes the oxidation by H<sub>2</sub>O<sub>2</sub> of 1 μmol of horse heart ferrocytochrome c per min per mg Ccp1.

<sup>b</sup> Recombinant Ccp1, GST-apoCcp1 and GST-holoCcp1 (1 μM) were assayed for CCP activity as described previously. For the assay, a stock solution of Cyc<sup>III</sup> was ~90% reduced with sodium dithionite and the Cyc<sup>II</sup> concentration determined spectrophotometrically ( $\epsilon_{550} = 7.6 \text{ mM}^{-1} \text{ cm}^{-1}$ ).<sup>1</sup>

<sup>c</sup> The activity of each fraction was ratioed by the activity of wild-type Ccp1 to give percent activity. Results are presented as averages ± SD from three independent experiments ( $n=3$ ).

**Table S2: Interactors in the GST pulldowns from 1 and 7 d yeast extracts (n=6)<sup>a</sup>**

| Accession number <sup>a</sup> | Protein ID <sup>b</sup> | Protein description <sup>c</sup>         | Sequence coverage (%) <sup>d</sup> | Unique peptides <sup>e</sup> | Subcellular location <sup>f</sup> | Subcellular fraction <sup>g</sup> |
|-------------------------------|-------------------------|------------------------------------------|------------------------------------|------------------------------|-----------------------------------|-----------------------------------|
| YGR254W*                      | ENO1                    | Enolase 1                                | 57.4 ± 10.6                        | 11                           | C, M, PM                          | P10, S10                          |
| YHR174W*                      | ENO2                    | Enolase 2                                | 56.1 ± 11.2                        | 16                           | V, M, PM                          | P10, S10                          |
| YBR072W**                     | HSP12                   | Heat shock protein 12                    | 54.1 ± 14.5                        | 20                           | C, PM, N                          | P10, S10                          |
| YAL005C*                      | SSA1: HSP70             | Heat shock protein 12                    | 49.4 ± 14.4                        | 14                           | C, PM, N                          | P10, S10                          |
| YLL024C*                      | SSA2: HSP70             | Heat shock protein 70                    | 45.0 ± 7.5                         | 13                           | C, M, V                           | P10, S10                          |
| YDL229W*                      | SSB1/SSB2               | Heat shock protein 70                    | 34.0 ± 4.4                         | 6                            | PM                                | P10                               |
| YNL055C*                      | POR1                    | Porin                                    | 35.7 ± 22.8                        | 22                           | M                                 | P10                               |
| YLR150W                       | STM1                    | Suppressor of TOM1                       | 49.6 ± 8.5                         | 11                           | C                                 | S10                               |
| YPL237W                       | SUI3                    | Suppressor of initiator codon            | 48.6 ± 9.5                         | 11                           | Multi-eIF complex                 | P10                               |
| YMR146C                       | TIF34                   | Translation initiation factor            | 52.2 ± 7.8                         | 15                           | Multi-eIF complex                 | P10                               |
| YDR429C                       | TIF35                   | Translation initiation factor            | 30.7 ± 1.3                         | 4                            | Multi-eIF complex                 | P10                               |
| YDL014W                       | NOP1                    | Nucleolar protein                        | 36.6 ± 6.7                         | 8                            | N                                 | S10                               |
| YLR197W                       | NOP56                   | Nucleolar protein                        | 42.0 ± 14.6                        | 16                           | N                                 | S10                               |
| YBR009C                       | HHF1                    | Histone H4                               | 43.8 ± 4.9                         | 6                            | N                                 | S10                               |
| YJL131C                       | AIM23                   | Altered inheritance rate of mitochondria | 40.5 ± 5.4                         | 8                            | M                                 | P10                               |
| YJR055W                       | HIT1                    | High temperature growth                  | 40.1 ± 20.6                        | 23                           | C, N                              | S10                               |
| YLL039C**                     | UBI4                    | Ubiquitin                                | 39.6 ± 3.7                         | 6                            | C                                 | S10                               |
| YLR074C                       | BUD20                   | BUD site selection                       | 31.6 ± 14.5                        | 23                           | C, N                              | S10                               |
| YNL178W*                      | RPS3                    | 40S ribosomal subunit                    | 53.7 ± 3.4                         | 11                           | R                                 | P10, S10                          |
| YNL096C                       | RPS7B                   | 40S ribosomal subunit                    | 32.8 ± 4.4                         | 18                           | R                                 | P10, S10                          |
| YER102W                       | RPS8B                   | 40S ribosomal subunit                    | 32.6 ± 18.7                        | 11                           | R                                 | P10, S10                          |
| YDR064W                       | RPS13                   | 40S ribosomal subunit                    | 48.1 ± 3.0                         | 14                           | R                                 | P10, S10                          |
| YMR143W*                      | RPS16A                  | 40S ribosomal subunit                    | 55.3 ± 5.4                         | 11                           | R                                 | P10, S10                          |
| YNL302C*                      | RPS19B <sup>i</sup>     | 40S ribosomal subunit                    | 59.7 ± 4.7                         | 11                           | R                                 | P10, S10                          |
| YML026C                       | RPS18B                  | 40S ribosomal subunit                    | 55.2 ± 9.7                         | 13                           | R, M                              | P10                               |
| YCR031C                       | RPS14A                  | 40S ribosomal subunit                    | 50.4 ± 16.6                        | 20                           | R                                 | P10, S10                          |
| YHL015W*                      | RPS20                   | 40S ribosomal subunit                    | 40.6 ± 14.9                        | 25                           | R                                 | P10, S10                          |
| YIL069C                       | RPS24B                  | 40S ribosomal subunit                    | 48.4 ± 4.5                         | 18                           | R                                 | P10, S10                          |
| YLR061W                       | RPL22A                  | 60S ribosomal subunit                    | 57.4 ± 9.5                         | 19                           | R                                 | P10, S10                          |
| YDR012W                       | RPL4B                   | 60S ribosomal subunit                    | 53.3 ± 3.4                         | 17                           | R                                 | P10, S10                          |
| YDR418W                       | RPL12B                  | 60S ribosomal subunit                    | 32.5 ± 4.8                         | 6                            | R                                 | P10, S10                          |
| YHL001W                       | RPL14B                  | 60S ribosomal subunit                    | 34.0 ± 1.2                         | 4                            | R                                 | P10, S10                          |
| YJL177W<br>YKL180W            | RPL17B/A                | 60S ribosomal subunit                    | 47.6 ± 12.6                        | 9                            | R                                 | P10, S10                          |
| YMR242C                       | RPL20A                  | 60S ribosomal subunit                    | 36.9 ± 4.3                         | 6                            | R                                 | P10, S10                          |
| YOL127W                       | RPL25                   | 60S ribosomal subunit                    | 33.3 ± 2.3                         | 5                            | R                                 | P10, S10                          |
| YDR471W                       | RPL27B                  | 60S ribosomal subunit                    | 34.6 ± 6.6                         | 7                            | R                                 | P10, S10                          |
| YGL030W                       | RPL30                   | 60S ribosomal subunit                    | 34.5 ± 8.5                         | 8                            | R                                 | P10, S10                          |
| YAL036C                       | RBG1                    | Ribosome interacting GTPase              | 42.7 ± 6.7                         | 5                            | C                                 | S10                               |

<sup>a-f</sup> See corresponding footnotes to Table 1 of the main text. Interactors in **red font** and **blue font** were pulled down by GST only in **1 d cells** or **7 day cells**, respectively. Interactors in black were pulled down by GST in both 1 d cells and 7 d cells.

\*,\*\*Interactors of GST-Ccp1 also: \*both 1 d and 7 d cells or in \*\*7 d cells only.

**Table S3: Reported Ccp1 interactors collated from the *Saccharomyces* Genome Database (SGD)<sup>a</sup>**

| Accession number <sup>b</sup> | Short name <sup>c</sup> | Protein description <sup>d</sup>                 | Interaction type <sup>e</sup> | Assay <sup>f</sup>                                                                    | Exp format <sup>g</sup> | Refs  |
|-------------------------------|-------------------------|--------------------------------------------------|-------------------------------|---------------------------------------------------------------------------------------|-------------------------|-------|
| YKR066C                       | CCP1                    | Cytochrome c peroxidase                          | Physical                      | Affinity-capture<br>Co-purification                                                   | MC<br>HTS               | 1,2   |
| YBL009W                       | ALK2                    | Protein kinase                                   | Genetic                       | Negative genetic                                                                      | HTS                     | 3     |
| YNR001C                       | CIT1                    | Citrate synthase                                 | Physical                      | Co-fractionation                                                                      | MC                      | 4     |
| YJR048W <sup>h</sup>          | CYC1                    | Cytochrome c isoform 1                           | Physical                      | Co-crystal structure<br>Affinity -capture<br>Co-purification<br>Reconstituted complex | MC                      | 2,5,6 |
| YOR065W                       | CYT1                    | Cytochrome c1                                    | Physical                      | Reconstituted complex                                                                 | MC                      | 7,8   |
| YDL160C                       | DHH1                    | Cytoplasmic DExD/H-box helicase                  | Physical                      | Affinity capture                                                                      | HTS                     | 9     |
| YER019W                       | ISC1                    | Inositol phosphosphingolipid phospholipase C     | Genetic                       | Positive genetic                                                                      | HTS                     | 10    |
| YPL004C                       | LSP1                    | Eisosome core component                          | Physical                      | Two-hybrid                                                                            | HTS                     | 11    |
| YKL195W                       | MIA40                   | Import and assembly protein in mitochondrial IMS | Physical                      | Co-purification                                                                       | MC                      | 12    |
| YKR016W                       | MIC60                   | Component of the MICOS complex                   | Physical                      | Affinity capture                                                                      | HTS                     | 13    |
| YCR077C                       | PAT1                    | Deadenylation-dependent mRNA-decapping factor    | Physical                      | Affinity capture                                                                      | HTS                     | 9     |
| YGR101W                       | PCP1                    | Rhomboid mitochondrial serine protease           | Physical                      | Biochemical activity                                                                  | MC                      | 14    |
| YHL034C                       | SBP1                    | Protein that binds eIF4G                         | Physical                      | Affinity capture                                                                      | HTS                     | 9     |
| YHR206W                       | SKN7                    | Nuclear transcription factor                     | Genetic                       | Phenotypic suppression                                                                | MC                      | 15    |
| YCL037C                       | SRO9                    | Cytoplasmic RNA-binding protein;                 | Physical                      | Affinity capture                                                                      | HTS                     | 16    |
| YNL209W <sup>h</sup>          | SSB2                    | HSP70                                            |                               | Affinity capture                                                                      | HTS                     | 17    |
| YHR005C-A                     | TIM10                   | Forms a complex with tim9p                       | Physical                      | Co-purification                                                                       | MC                      | 12    |
| YNL299W                       | TRF5                    | Non-canonical poly(A) polymerase                 | Physical                      | Affinity capture                                                                      | MC                      | 18    |
| YML028W <sup>h</sup>          | TSA1                    | Thioredoxin peroxidase                           | Genetic                       | Synthetic growth defect                                                               | HTS                     | 19    |
| YLL039C <sup>h</sup>          | UBI4                    | Ubiquitin                                        | Physical                      | Co-purification                                                                       | HTS                     | 20    |
| YGR019W                       | UGA1                    | Gamma-aminobutyrate (GABA) transaminase          | Physical                      | Negative genetic                                                                      | HTS                     | 10    |
| YCR007C                       | -----                   | Unknown                                          | Genetic                       | Two-hybrid                                                                            | HTS                     | 11    |

<sup>a</sup> Ccp1 interactors found at <http://www.yeastgenome.org>.

<sup>b</sup> The GenBank (<http://www.ncbi.nlm.nih.gov/genbank/>) identifier assigned to each gene sequence

<sup>c</sup> Four-letter/number yeast notation for protein

<sup>d</sup> Protein name/description from given reference(s) and/or SGD website

<sup>e</sup> Interaction type from given reference(s)

<sup>f</sup> Type of assay used to probe interactions

<sup>g</sup> Experimental format, MC- manually curated; HTS- high through put screen

<sup>h</sup> Proteins identified in this study are highlighted in grey

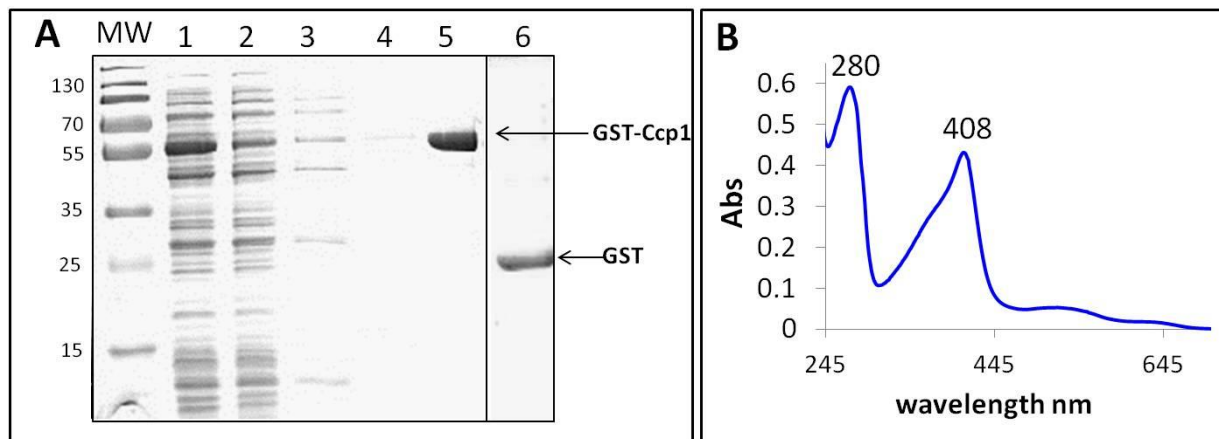

**Figure S1: SD-PAGE analysis of recombinant GST-Ccp1 purification.**

(A) Coomassie-stained 12% SDS-PAGE gel showing the proteins in: (lane 1) the soluble fraction from *E. coli* BL21(DE3) cells transfected with the pGEX-2T-Ccp1 plasmid; (lane 2) the supernatant (batch mode) of the Glutathione Sepharose 4B resin; (lanes 3, 4) washings from the resin; (lane 5) the GST-Ccp1 fusion protein (MW ~60 kDa) eluted with 50 mM reduced GSH at pH 8.0; and (lane 6) the GST protein (MW ~30 kDa) eluted with 50 mM reduced GSH at pH 8.0 from resin added to a lysate of *E. coli* harboring the empty pGEX-4T plasmid. The markers are in lane MW and their molecular weights in kDa are indicated on the left. The GSH eluate from the Glutathione Sepharose 4B resin was decomplexified by 1D SDS-PAGE under reducing conditions on 8 cm x 5.8 cm x 1 mm 6% stacking and 12% resolving gel for 1 h at 120 V. The gel was Coomassie stained for 15 min and destained overnight at 4°C with 25 mM ammonium bicarbonate (pH 8.0)/50% acetonitrile. (B) The room temperature UV-vis spectrum of 4 μM GST-Ccp1 in 20 mM KPi buffer (pH 7.5) with 500 mM NaCl in a 1-cm pathlength cuvette following reconstitution with heme (see *Materials and Methods* of the main text). The 408/280 absorbance ratio is  $0.77 \pm 0.03$  ( $n=3$ ), which agrees, within experimental error, with the calculated ratio of 0.79 for fully heme-loaded GST-Ccp1.

### Screening for Ccp1 as an interactor of Sod2 in 1 d yeast cells expressing the GST-Sod2 fusion

Yeast cells transformed with the GAL1-10 UAS vector containing the GST-Sod2 coding sequence (GE Dharmacon) were grown overnight in 20 mL of synthetic complete medium with 2% raffinose but minus uracil (SR-ura) as the plasmid is URA<sup>+</sup>. Raffinose was used as a sugar since glucose represses GAL1 expression. Cells were pelleted at 2,000 x g for 5 min, washed 2X with sterile water, resuspended in 500 mL of SG-ura (4% galactose) or YPG (1% yeast extract, 2% peptone, 4% galactose) to induce GST-Sod2 expression, pelleted after 12 h at 2,000 x g, snap frozen and stored at -80 °C. The GST-Sod2 pulldown assays were performed as reported<sup>2</sup> using the MagneGST Pull-Down System kit (Promega). Briefly, cells were resuspended in binding buffer (20 mM Tris pH 7.5, 100 mM NaCl, 1 mM EDTA, 10% glycerol, 0.1% NP-40, 10 mM β-mercaptoethanol and 1 mM PMSF)<sup>2</sup>, broken by vortexing for 5 x 15 s with an equal volume of 0.5 mm acid-washed glass beads in the same buffer. Unbroken cells and cell debris were removed by centrifugation at 2,000 x g for 5 min and the lysate was cleared by centrifugation at 13,000 x g for 10 min. The supernatant, which corresponds to the soluble protein extract (2 mg) was added to a

200  $\mu$ L slurry of the GSH-linked magnetic beads with end-over-end rotation for 1 h at 4°C. The control GST bait purified from *E. coli* BL21(DE3) cells (see main text) was bound to a 200  $\mu$ L slurry of GSH-linked magnetic beads and added to the soluble protein extract (2 mg) from wild-type cells prepared as described above for the GST-Sod2-expressing strain, and pulldowns were carried out as outlined in the *Materials and Methods* of the main text. The proteins separated by 1D 12% SDS-PAGE were transferred to a methanol-soaked polyvinylidene fluoride (PVDF, BioRad) membrane at 100 mA for 3 h at room temperature. After blocking for 1 h with 5% (w/v) skim milk in TBST (50 mM Tris, 150 mM NaCl and 0.05% v/v Tween 20, pH 7.6), the membrane was incubated for 2 h with rabbit anti-Ccp1 serum (1:10,000 dilution) (kindly provided by Professor David Goodin, University of California, Davis), washed 3 times with TBST, and probed for 1 h with goat anti-rabbit HRP conjugated secondary antibody (1:20,000, Biorad). Blots were visualized using the Super Signal West Pico Enhanced Chemiluminescence (ECL) kit from Thermo Fisher in an Alphalmager (ProteinSimple).

Figure S2A (top panel) establishes the overexpression of the GST-Sod2 and GST bait proteins in the yeast strains. The presence of Ccp1 in the GST-Sod1 pulldown from 1 d cells but not in the corresponding GST control pulldown was demonstrated by Western blotting against anti-Ccp1 (Figure S2A, bottom panel) and confirmed by LC-MS/MS (Figure S2B).

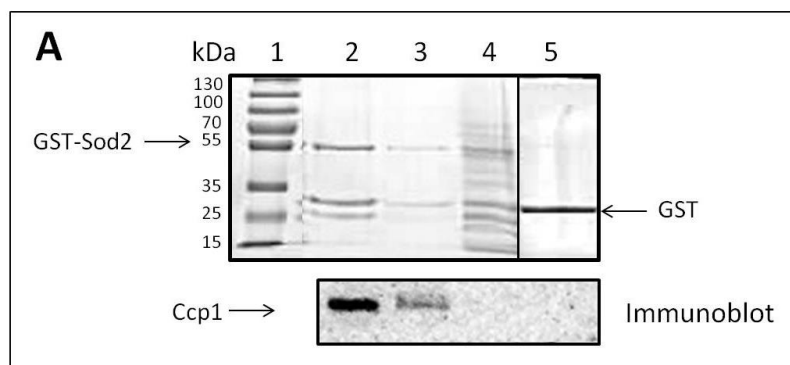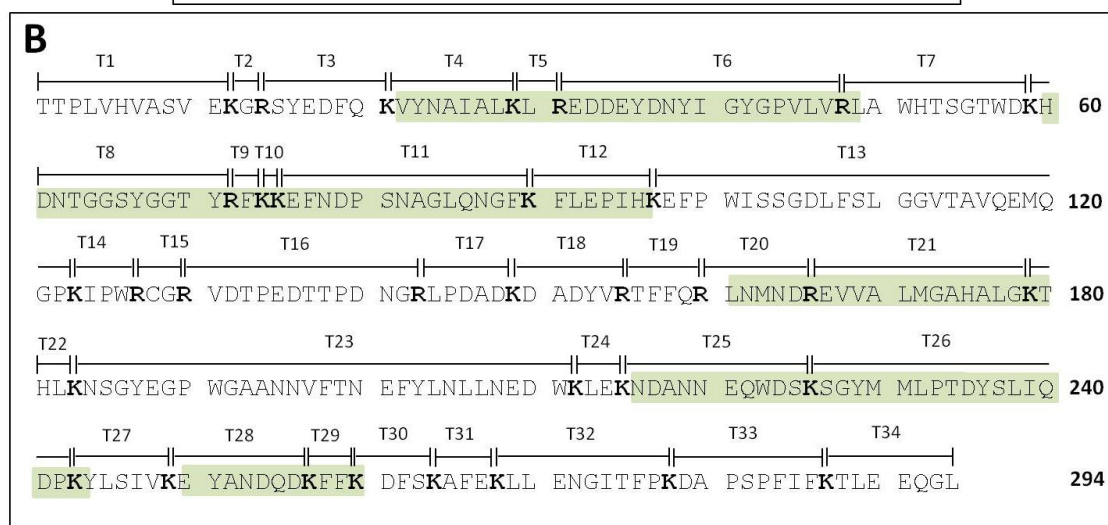

**Figure S2: Identification of Ccp1 in a GST-Sod2 pulldown from a soluble protein extract of 1 d yeast.**

**(A) Top panel:** Silver-stained 12% SDS PAGE of the GST-Sod2 bait protein and prey proteins from 1 d yeast overexpressing GST-Sod2. The molecular weight markers (kDa) are in lane 1 and proteins pulled down by the GST-Sod2 bait in a two-step elution from the GSH magnetic beads are in lanes 2, 3. Lane 4 shows the proteins released from the GSH magnetic beads after boiling in SDS loading buffer. Proteins pulled down by the GST control bait from 1 d wild-type yeast are in lane 5 and arrows indicate the bait proteins. Experimental details are provided in the text above. **Bottom panel:** Anti-Ccp1 immunoblot analysis confirming that Ccp1 is present in lanes 2 and 3 close to the 35 kDa marker. **(B)** Ccp1 sequence with the trypsin cleavage sites (**K**, **R**) bolded. Nine unique Ccp1 peptides were detected by MS in the GST-Sod2 pulldowns and the Ccp1 sequence covered (~33%) by MS/MS in two independent experiments ( $n=2$ ) is highlighted in green. Details of the mass spectrometric analysis are given in the *Materials and Methods* of the main text.

|      |   |                        |         |             |      |       |         |     |       |
|------|---|------------------------|---------|-------------|------|-------|---------|-----|-------|
| TDH3 | 1 | MVRVAINGFGRIGRLVMRIALS | RPN     | VEVVALNDPFI | TNDY | AAYMF | KYDSTHG | RYA | GEVSH |
| TDH2 | 1 | MVRVAINGFGRIGRLVMRIAL  | QRKN    | VEVVALNDPFI | SNDY | SAYMF | KYDSTHG | RYA | GEVSH |
| TDH1 | 1 | MIRIAINGFGRIGRLVLR     | LALQRKD | IEVVAVNDPFI | SNDY | AAYMV | KYDSTHG | RYK | GTVSH |

  

|      |    |           |        |            |      |      |         |        |                |
|------|----|-----------|--------|------------|------|------|---------|--------|----------------|
| TDH3 | 61 | DDKHIIVDG | KKIATY | QERDPANLPW | GSSN | VDTA | TDSTGVF | KELDTA | QKHIDAGAKKVVIT |
| TDH2 | 61 | DDKHIIVDG | HKIATF | QERDPANLPW | ASLN | IDIA | TDSTGVF | KELDTA | QKHIDAGAKKVVIT |
| TDH1 | 61 | DDKHIIIDG | VKIATY | QERDPANLPW | GSLK | IDVA | VDSTGVF | KELDTA | QKHIDAGAKKVVIT |

  

|      |     |      |         |       |      |     |         |          |           |           |          |       |
|------|-----|------|---------|-------|------|-----|---------|----------|-----------|-----------|----------|-------|
| TDH3 | 121 | APSS | TAPMFVM | GVNEE | KYTS | DL  | KIVSNAS | CTTNCLAP | LAKVINDAF | GIEEGLMT  | TVHSLT   |       |
| TDH2 | 121 | APSS | TAPMFVM | GVNEE | KYTS | DL  | KIVSNAS | CTTNCLAP | LAKVINDAF | GIEEGLMT  | TVHSM    |       |
| TDH1 | 121 | APSS | SAPMFV  | VGVN  | H    | TKY | TPDK    | KIVSNAS  | CTTNCLAP  | LAKVINDAF | GIEEGLMT | TVHSM |

  

|      |     |          |       |       |        |       |         |        |        |        |        |
|------|-----|----------|-------|-------|--------|-------|---------|--------|--------|--------|--------|
| TDH3 | 181 | ATQKTVDG | PSHKD | WRGGR | TASGNI | IIPSS | TGAAKAV | GKVLPE | LQKLTG | MAFRVP | TVDVSV |
| TDH2 | 181 | ATQKTVDG | PSHKD | WRGGR | TASGNI | IIPSS | TGAAKAV | GKVLPE | LQKLTG | MAFRVP | TVDVSV |
| TDH1 | 181 | ATQKTVDG | PSHKD | WRGGR | TASGNI | IIPSS | TGAAKAV | GKVLPE | LQKLTG | MAFRVP | TVDVSV |

  

|      |     |          |    |   |      |       |       |      |     |        |         |        |       |     |        |        |      |
|------|-----|----------|----|---|------|-------|-------|------|-----|--------|---------|--------|-------|-----|--------|--------|------|
| TDH3 | 241 | VDLTVKLN | KE | T | TYDE | IKKVV | KAAA  | E    | CKL | KGVLCY | TEDAVV  | SSDFL  | GDS   | HS  | SIFDAS | AGIQ   |      |
| TDH2 | 241 | VDLTVKLN | KE | T | TYDE | IKKVV | KAAA  | E    | CKL | KGVLCY | TEDAVV  | SSDFL  | GDS   | NS  | SIFDAA | AGIQ   |      |
| TDH1 | 241 | VDLTVKLE | KE | A | TYD  | Q     | IKKAV | KAAA | E   | GP     | MKGVLCY | TEDAVV | SSDFL | GDT | HA     | SIFDAS | AGIQ |

  

|      |     |          |   |        |      |   |       |    |   |      |      |
|------|-----|----------|---|--------|------|---|-------|----|---|------|------|
| TDH3 | 301 | LSPKFVKL | V | SWYDNE | YGYS | T | RVVDL | VE | H | VAKA |      |
| TDH2 | 301 | LSPKFVKL | V | SWYDNE | YGYS | T | RVVDL | VE | H | VAKA |      |
| TDH1 | 301 | LSPKFVKL | I | SWYDNE | YGYS | A | RVVDL | I  | E | Y    | VAKA |

**Figure S3: Sequence alignment of the TDH3/2/1 isoforms of yeast GAPDH.**

Identical, similar and dissimilar residues are indicated by filled-in black boxes, black-outlined boxes and white boxes, respectively. The alignment was carried out using clustalW2 from Embl (<http://www.ebi.ac.uk/Tools/msa/clustalw2/>) and ESPrpt was used to generate the alignment image (<http://esprpt.ibcp.fr/ESPrpt/ESPrpt/>). The red, blue and green line localizes the isoform-specific sequence in panels A, B and C, respectively, of Figure 5 of the main text.

## References

- 1 T. Yonetani, *J Biol Chem*, 1965, **240**, 4509–4514.
- 2 J. Mok, H. Im and M. Snyder, *Nat Protoc*, 2009, **4**, 1820–1827.
